# Supplementary material for: The growth factor BMP11 is required for the development and evolution of a male exaggerated weapon and its associated fighting behavior in a water strider
Source: PLoS Biol. 2021 May 11;19(5):e3001157. doi: 10.1371/journal.pbio.3001157 (PMC8112723; doi:10.1371/journal.pbio.3001157)
Supplement: S7 Table — (XLSX) [file pbio.3001157.s015.xlsx]

## Sheet: Supplementary table 8
individuals	species	Treatment	sex	body	L1	L2	L3	injection	remarks	pronotum	mesonotum	ratio
Msp_GDF11_Sept20_Male 1 left	M. sp	BMP11	Male	1804	1619	1883.5	2143	2nd_round	WT-like	393.639	401.165	0.98124
Msp_GDF11_Sept20_Male 2	M. sp	BMP11 RNAi	Male	1894	1635	1894	2206	2nd_round		362.691	413.582	0.876951
Msp_GDF11_Sept20_Male 3	M. sp	BMP11 RNAi	Male	1723	1555.5	1870	2137	2nd_round	WT-like	368.075	397.4	0.926208
Msp_GDF1_Sept201_Male 4	M. sp	BMP11 RNAi	Male	1933	1702	2026.5	2360	2nd_round		395.066	434.601	0.909032
Msp_GDF11_Sept20_Male 5	M. sp	BMP11 RNAi	Male	1834	1668	2052.5	2235.5	2nd_round	WT-like	388.702	396.416	0.980541
Msp_GDF11_Sept20_Male 6	M. sp	BMP11 RNAi	Male	1727	1612.5	1884.5	2155.5	2nd_round	WT-like	350.695	379.542	0.923995
Msp_GDF11_Sept20_Male 7	M. sp	BMP11 RNAi	Male	1844	1635.5	1939	2219.5	2nd_round	WT-like	404.167	407.452	0.991938
Msp_GDF11_Sept20_Male 8	M. sp	BMP11 RNAi	Male	1942	1658	1948.5	2244	2nd_round	WT-like	410.017	415.836	0.986007
Msp_GDF11_Oct14Injection_Male1	M. sp	BMP11 RNAi	Male	1830	1625.5	1933	2303.5	2nd_round		459.52	478.758	0.959817
Msp_GDF11_Oct14Injection_Male2	M. sp	BMP11 RNAi	Male	1978	1687	2004	2363	2nd_round		406.023	440.554	0.921619
Msp_GDF11_Oct14Injection_Male3	M. sp	BMP11 RNAi	Male	1857	1678	1969.5	2283.5	2nd_round		402.762	422.335	0.953655
Msp_GDF11_Oct14Injection_Male4	M. sp	BMP11 RNAi	Male	1898	1669.5	2007	2323	2nd_round	winged, excluded	winged	winged
Msp_GDF11_Oct14Injection_Male5	M. sp	BMP11 RNAi	Male	2010	1897.5	2196.5	2560	2nd_round		423.492	450.29	0.940487
Msp_GDF11_Oct14Injection_Male6	M. sp	BMP11 RNAi	Male	1981	1787.5	2101.5	2460.5	2nd_round		425.273	441.569	0.963095
Msp_GDF11_Oct14Injection_Male7	M. sp	BMP11 RNAi	Male	1663	1559	1823.5	2130.5	2nd_round		446.891	451.92	0.988872
Msp_GDF11_Oct14inj_2020_Female1	M. sp	BMP11 RNAi	Female	1956	1524	1811.5	2198	2nd_round		390.44	407.368	0.958445
Msp_GDF11_Oct14inj_2020_Female2	M. sp	BMP11 RNAi	Female	1791	1457.5	1729	2081.5	2nd_round		322.595	359.49	0.897368
Msp_GDF11_Oct14inj_2020_Female3	M. sp	BMP11 RNAi	Female	1843	1460.5	1766	2126	2nd_round		357.417	375.259	0.952454
Msp_GDF11_Oct14inj_2020_Female4	M. sp	BMP11 RNAi	Female	1799	1448.5	1722.5	1982	2nd_round		341.827	365.126	0.936189
Msp_GDF11_Oct14inj_2020_Female5	M. sp	BMP11 RNAi	Female	1911	1484	1730.5	2068.5	2nd_round		329.802	380.737	0.86622
Msp_GDF11_Oct14inj_2020_Female6 W	M. sp	BMP11 RNAi	Female	1921	1446	1681	2020	2nd_round	winged, excluded	Winged	Winged
Msp_GDF11_Oct14inj_2020_Female7 W	M. sp	BMP11 RNAi	Female	1895	1478.5	1692.5	2101	2nd_round	winged, excluded	Winged	Winged
Msp_GDF11_RNAi_Nov2020inj_Male1	M. sp	BMP11 RNAi	Male	2063	1851.396	2215.4365	2518.229	2nd_round	WT-like	426.558	444.105	0.960489
Msp_GDF11_RNAi_Nov2020inj_Male2	M. sp	BMP11 RNAi	Male	1896	1669.6235	1949.177	2286.984	2nd_round		354.662	417.007	0.850494
Msp_GDF11_RNAi_Nov2020inj_Male3	M. sp	BMP11 RNAi	Male	1812	1613.105	1897.0395	2213.697	2nd_round		353.4	411.286	0.859256
Msp_GDF11_RNAi_Nov2020inj_Male4	M. sp	BMP11 RNAi	Male	1911	1677.834	1989.1125	2321.377	2nd_round	WT-like	392.589	421.245	0.931973
Msp_GDF11_RNAi_Nov2020inj_Male5	M. sp	BMP11 RNAi	Male	1938	1703.275	2067.03	2364.3015	2nd_round		369.506	435.726	0.848024
Msp_GDF11_RNAi_Nov2020inj_Male6	M. sp	BMP11 RNAi	Male	1932	1761.3615	2062.7235	2418.3075	2nd_round		384.374	433.894	0.885871
Msp_GDF11_RNAi_Nov2020inj_Male7	M. sp	BMP11 RNAi	Male	1983	1740.888	2099.793	2407.1695	2nd_round		399.65	444.829	0.898435
Msp_GDF11_RNAi_Nov2020inj_Male8	M. sp	BMP11 RNAi	Male	2087	1774.4975	2137.9315	2470.214	2nd_round	WT-like	451.701	458.828	0.984467
Msp_GDF11_RNAi_Nov2020inj_Male9	M. sp	BMP11 RNAi	Male	1819	1655.486	2003.9245	2304.899	2nd_round		346.886	403.962	0.858709
Msp_GDF11_RNAi_Nov2020inj_Male10	M. sp	BMP11 RNAi	Male	2067	1779.6755	2103.588	2442.958	2nd_round		398.284	459.063	0.867602
Msp_GDF11_RNAi_Nov2020inj_Male11	M. sp	BMP11 RNAi	Male	1946	1693.3325	2035.333	2351.1015	2nd_round		392.532	438.47	0.895231
Msp_GDF11_RNAi_Nov2020inj_Male12	M. sp	BMP11 RNAi	Male	1971	1750.6205	2030.708	2340.61	2nd_round		383.997	433.724	0.885349
Msp_GDF11_RNAi_Nov2020inj_Male13	M. sp	BMP11 RNAi	Male	1906	1709.517	2043.209	2332.4655	2nd_round		372.103	429.435	0.866494
Msp_GDF11_RNAi_Nov2020inj_Male14	M. sp	BMP11 RNAi	Male	1801	1617.954	1914.1265	2214.095	2nd_round		346.345	396.209	0.874147
Msp_GDF11_RNAi_Nov2020inj_Male15	M. sp	BMP11 RNAi	Male	1929	1742.1	2029.8555	2358.207	2nd_round	WT-like	407.878	417.429	0.977119
Msp_GDF11_RNAi_Nov2020inj_Male16	M. sp	BMP11 RNAi	Male	1971	1742.1345	2054.566	2365.55	2nd_round		393.866	441.456	0.892198
Msp_GDF11_RNAi_Nov2020inj_Male17	M. sp	BMP11 RNAi	Male	1849	1642.9755	1938.3975	2263.0855	2nd_round		350.245	398.196	0.879579
Msp_GDF11_RNAi_Nov2020inj_Male18 W	M. sp	BMP11 RNAi	Male	1903	1656.2285	1918.03	2260.315	2nd_round	winged, excluded	winged	winged
Msp_GDF11_RNAi_Nov2020inj_Male19	M. sp	BMP11 RNAi	Male	2097	1794.804	2123.4625	2476.222	2nd_round		425.381	469.351	0.906317
Msp_GDF11_Sept20_Female 1	M. sp	BMP11 RNAi	Female	1745	1410.508	1659.8605	1983.4375	2nd_round		297.052	348.441	0.852517
Msp_GDF11_Sept20_Female 2	M. sp	BMP11 RNAi	Female	1649	1391.543	1658.302	1873.0975	2nd_round		312.634	383.316	0.815604
Msp_GDF11_Sept20_Female 3	M. sp	BMP11 RNAi	Female	1740	1434.7065	1693.456	1981.014	2nd_round		315.442	356.464	0.88492
Msp_GDF11_Sept20_Female 4	M. sp	BMP11 RNAi	Female	1823	1459.466	1698.1765	2048.6515	2nd_round		355.1	377.316	0.941121
Msp_GDF11_Sept20_Female 5	M. sp	BMP11 RNAi	Female	1756	1449.6605	1697.09	2014.7855	2nd_round		323.206	349.849	0.923844
Msp_GDF11_Sept20_Female 6	M. sp	BMP11 RNAi	Female	1693	1431.5435	1625.834	2016.84	2nd_round		313.999	337.412	0.93061
Msp_GDF11_RNAi_Nov2020inj_Female1	M. sp	BMP11 RNAi	Female	1786	1456.6545	1676.846	1984.9865	2nd_round		294.823	342.984	0.859582
Msp_GDF11_RNAi_Nov2020inj_Female2	M. sp	BMP11 RNAi	Female	1717	1390.3355	1657.5225	1959.3045	2nd_round		285.301	326.831	0.872931
Msp_GDF11_RNAi_Nov2020inj_Female3	M. sp	BMP11 RNAi	Female	1841	1426.351	1672.925	1977.5485	2nd_round		318.513	354.932	0.897392
Msp_GDF11_RNAi_Nov2020inj_Female4	M. sp	BMP11 RNAi	Female	1906	1489.5105	1791.7325	2145.963	2nd_round		378.774	388.982	0.973757
Msp_GDF11_RNAi_Nov2020inj_Female5	M. sp	BMP11 RNAi	Female	1701	1393.4795	1666.421	1958.353	2nd_round		305.89	362.735	0.843288
Msp_GDF11_RNAi_Nov2020inj_Female6	M. sp	BMP11 RNAi	Female	1757	1482.3185	1764.414	2024.3175	2nd_round		331.495	368.012	0.900772
Msp_GDF11_RNAi_Nov2020inj_Female7	M. sp	BMP11 RNAi	Female	1779	1455.6035	1675.768	2005.7265	2nd_round		309.797	353.578	0.876177
Msp_GDF11_RNAi_Nov2020inj_Female8	M. sp	BMP11 RNAi	Female	1817	1464.1955	1702.522	2023.628	2nd_round		306.722	373.913	0.820303
Msp_GDF11_RNAi_Nov2020inj_Female9	M. sp	BMP11 RNAi	Female	1729	1410.9965	1636.3565	1977.7555	2nd_round		308.158	363.807	0.847037
Msp_GDF11_RNAi_Nov2020inj_Female10	M. sp	BMP11 RNAi	Female	1768	1489.501	1759.3445	2101.509	2nd_round		302.459	374.126	0.808442
Msp_GDF11_RNAi_Nov2020inj_Female11	M. sp	BMP11 RNAi	Female	1799	1479.8875	1747.247	2083.3095	2nd_round		328.623	359.238	0.914778
Msp_GDF11_RNAi_Nov2020inj_Female12	M. sp	BMP11 RNAi	Female	1698	1390.102	1657.71	1923.7505	2nd_round		318.915	362.582	0.879567
Msp_GDF11_RNAi_Nov2020inj_Female13 W	M. sp	BMP11 RNAi	Female	1924	1493.939	1767.2095	2109.192	2nd_round	winged, excluded	winged	winged
Msp_GDF11_RNAi_Nov2020inj_Female14 W	M. sp	BMP11 RNAi	Female	1839	1416.383	1668.7855	2025.277	2nd_round	winged, excluded	winged	winged
Msp_GDF11_RNAi_Nov2020inj_Female15 W	M. sp	BMP11 RNAi	Female	2017	1497.493	1761.341	2107.187	2nd_round	winged, excluded	winged	winged
Msp_GDF11_RNAi_Nov2020inj_Female16	M. sp	BMP11 RNAi	Female	1756	1472.484	1692.2245	2009.0015	2nd_round		310.457	358.608	0.865728
Msp_GDF11_RNAi_Nov2020inj_Female17 W	M. sp	BMP11 RNAi	Female	1966	1473.5695	1692.535	2069.9165	2nd_round	winged, excluded		Winged
Msp_WT_Ctl_Male1	M. sp	Non injected	Male	2116	1868.5	2267.5	2561	2nd_round		453.28	466.654	0.971341
Msp_WT_Ctl_Male2	M. sp	Non injected	Male	2025	1806.5	2160	2408.5	2nd_round		421.617	426.778	0.987907
Msp_WT_Ctl_Male3	M. sp	Non injected	Male	1993	1830.5	2206	2533.5	2nd_round		419.968	435.902	0.963446
Msp_WT_Ctl_Male4	M. sp	Non injected	Male	2072	1797.5	2149	2478.5	2nd_round		450.233	456.75	0.985732
Msp_WT_Ctl_Male5	M. sp	Non injected	Male	2172	1874	2214	2527	2nd_round		440.67	466.607	0.944414
Msp_WT_Ctl_Male6	M. sp	Non injected	Male	2139	1906.5	2288.5	2574	2nd_round		461.373	466.619	0.988757
Msp_WT_Ctl_Male7	M. sp	Non injected	Male	2162	1920.5	2277	2578	2nd_round		467.178	479.253	0.974805
Msp_WT_Ctl_Male8	M. sp	Non injected	Male	2067	1848	2232.5	2497	2nd_round		450.036	457.723	0.983206
Msp_WT_Ctl_Male9	M. sp	Non injected	Male	2255	1981	2397	2639.5	2nd_round		464.226	470.723	0.986198
Msp_WT_Ctl_Male10	M. sp	Non injected	Male	2263	1975	2353	2649.5	2nd_round		468.024	471.029	0.99362
Msp_Buffer_Injected_Ctl_Male1	M. sp	Buffer injected	Male	2091	1851	2144	2521	2nd_round		459.52	478.758	0.959817
Msp_Buffer_Injected_Ctl_Male2	M. sp	Buffer injected	Male	2120	1842.5	2205	2522	2nd_round		406.023	440.554	0.921619
Msp_Buffer_Injected_Ctl_Male3	M. sp	Buffer injected	Male	1982	1774.5	2123.5	2457.5	2nd_round		402.762	422.335	0.953655
Msp_Buffer_Injected_Ctl_Male4	M. sp	Buffer injected	Male	2281	1963	2358	2677.5	2nd_round	winged, excluded	Winged	Winged
Msp_Buffer_Injected_Ctl_Male5	M. sp	Buffer injected	Male	2018	1799	2154	2458	2nd_round		423.492	450.29	0.940487
Msp_Buffer_Injected_Ctl_Male6	M. sp	Buffer injected	Male	2101	1867	2240.5	2509.5	2nd_round		425.273	441.569	0.963095
Msp_Buffer_Injected_Ctl_Male7	M. sp	Buffer injected	Male	2166	1865	2256	2598.5	2nd_round		446.891	451.92	0.988872
Msp_Buffer_Injected_Ctl_Female1	M. sp	Buffer injected	Female	1964	1540	1821.5	2189	2nd_round		361.841	378.225	0.956682
Msp_Buffer_Injected_Ctl_Female2	M. sp	Buffer injected	Female	1758	1422	1654	1997	2nd_round		341.027	356.06	0.95778
Msp_Buffer_Injected_Ctl_Female3	M. sp	Buffer injected	Female	1889	1490.5	1765	2106	2nd_round		332.302	368.755	0.901146
Msp_Buffer_Injected_Ctl_Female4	M. sp	Buffer injected	Female	2111	1547.5	1842	2218.5	2nd_round	winged, excluded	winged	Winged
Msp_WT_Ctl_Male1	M. sp	Non injected	Male	2125	1791.1265	2127.441	2441.478	2nd_round	winged, excluded	Winged	Winged
Msp_WT_Ctl_Male2	M. sp	Non injected	Male	2127	1687.518	2243.1825	2521.215	2nd_round		453.51	464.689	0.975943
Msp_WT_Ctl_Male3	M. sp	Non injected	Male	2100	1827.0395	2188.5665	2476.631	2nd_round		421.192	450.952	0.934006
Msp_WT_Ctl_Male4	M. sp	Non injected	Male	2240	1961.522	2367.296	2645.9035	2nd_round		485.019	496.615	0.97665
Msp_WT_Ctl_Male5	M. sp	Non injected	Male	2088	1808.941	2169.8725	2506.3245	2nd_round		450.233	458.493	0.981984
Msp_WT_Ctl_Male6	M. sp	Non injected	Male	2084	1845.495	2204.9195	2507.473	2nd_round		452.449	460.614	0.982274
Msp_WT_Ctl_Male7	M. sp	Non injected	Male	2220	1667.3075	2351.7215	2641.729	2nd_round		477.104	490.573	0.972544
Msp_WT_Ctl_Male8	M. sp	Non injected	Male	2166	1880.042	2263.973	2570.676	2nd_round		456.484	467.796	0.975819
Msp_WT_Ctl_Male9	M. sp	Non injected	Male	2234	1884.148	2304.0565	2600.978	2nd_round		485.004	486.551	0.99682
Msp_WT_Ctl_Male10	M. sp	Non injected	Male	2115	1916.1715	2283.511	2622.69	2nd_round		456.484	477.222	0.956544
Msp_WT_Ctl_Male11	M. sp	Non injected	Male	2204	1960.9985	2318.443	2633.115	2nd_round		492.681	508.771	0.968375
Msp_WT_Ctl_Male12	M. sp	Non injected	Male	2164	1892.3775	2257.7955	2542.754	2nd_round		499.258	508.604	0.981624
Msp_WT_Ctl_Male13	M. sp	Non injected	Male	2180	1897.0095	2267.5885	2555.7935	2nd_round		474.232	485.019	0.97776
Msp_WT_Ctl_Male14	M. sp	Non injected	Male	2214	1906.827	2297.2255	2614.968	2nd_round		451.141	461.003	0.978608
Msp_WT_Ctl_Male15	M. sp	Non injected	Male	2186	1931.946	2341.6345	2654.5075	2nd_round		463.004	480.309	0.963971
Msp_WT_Ctl_Male16	M. sp	Non injected	Male	2054	1793.396	2140.3845	2416.4405	2nd_round		431.041	451.37	0.954962
Msp_WT_Ctl_Male17	M. sp	Non injected	Male	2117	1902.615	2268.8805	2575.4315	2nd_round		473.287	496.22	0.953785
Msp_WT_Ctl_Male18	M. sp	Non injected	Male	2142	1901.5265	2284.1995	2571.2675	2nd_round		470.088	478.351	0.982726
Msp_WT_Ctl_Male19	M. sp	Non injected	Male	2297	1911.8565	2313.2355	2600.7	2nd_round	winged, excluded	Winged	Winged
Msp_WT_Ctl_Male20	M. sp	Non injected	Male	2214	1925.25	2318.318	2602.2415	2nd_round		500.207	505.955	0.988639
Msp_WT_Ctl_Female1	M. sp	Non injected	Female	1930	1536.3715	1816.034	2188.994	2nd_round		398.174	406.873	0.97862
Msp_WT_Ctl_Female2	M. sp	Non injected	Female	1925	1474.224	1761.358	2097.2345	2nd_round		376.991	390.08	0.966445
Msp_WT_Ctl_Female3	M. sp	Non injected	Female	1927	1505.5865	1790.097	2163.633	2nd_round		397.338	403.312	0.985188
Msp_WT_Ctl_Female4	M. sp	Non injected	Female	1891	1525.1705	1778.717	2161.9185	2nd_round		336.257	362.206	0.928358
Msp_WT_Ctl_Female5	M. sp	Non injected	Female	1982	1539.2415	1846.133	2221.309	2nd_round		403.143	412.648	0.976966
Msp_WT_Ctl_Female6	M. sp	Non injected	Female	1948	1508.07	1782.2115	2142.115	2nd_round		412.239	420.455	0.980459
Msp_WT_Ctl_Female7	M. sp	Non injected	Female	1952	1532.084	1814.7405	2189.493	2nd_round		374.081	393.281	0.95118
Msp_WT_Ctl_Female8	M. sp	Non injected	Female	1974	1553.7475	1846.579	2200.685	2nd_round		397.338	406.244	0.978077
Msp_WT_Ctl_Female9	M. sp	Non injected	Female	1934	1455.109	1744.4415	2109.7045	2nd_round		359.929	412.141	0.873315
Msp_WT_Ctl_Female10	M. sp	Non injected	Female	1978	1515.2335	1818.4	2197.627	2nd_round		415.388	424.601	0.978302
Msp_WT_Ctl_Female11	M. sp	Non injected	Female	1877	1492.921	1769.249	2125.6455	2nd_round		336.729	364.46	0.923912
Msp_WT_Ctl_Female12	M. sp	Non injected	Female	1998	1567.071	1857.9765	2217.6495	2nd_round		390.694	392.453	0.995518
Msp_WT_Ctl_Female13	M. sp	Non injected	Female	1995	1571.6155	1888.5995	2243.74	2nd_round		384.2	390.604	0.983605
Msp_WT_Ctl_Female14	M. sp	Non injected	Female	1952	1476.783	1799.556	2164.951	2nd_round		381.934	389.628	0.980253
Msp_WT_Ctl_Female15	M. sp	Non injected	Female	1845	1469.93	1727.2105	2076.213	2nd_round		356.392	363.807	0.979618
Msp_WT_Ctl_Female16	M. sp	Non injected	Female	1976	1514.4705	1831.666	2188.3575	2nd_round		372.206	391.237	0.951357
Msp_WT_Ctl_Female17	M. sp	Non injected	Female	1907	1503.1535	1796.7255	2154.5175	2nd_round		328.282	360.896	0.90963
Msp_WT_Ctl_Female18	M. sp	Non injected	Female	1974	1522.5	1808.007	2158.711	2nd_round		354.548	375.077	0.945267
Msp_WT_Ctl_Female19	M. sp	Non injected	Female	1954	1535.695	1817.826	2196.7565	2nd_round		376.436	388.439	0.969099
GDF11 M1	M. longipes	Fragment 1, BMP11 RNAi	Male	1923.389587	1726.591533	2670.468372	4301.251248	1st_round		389.323	535.03	0.727666
GDF11 M2	M. longipes	Fragment 1, BMP11 RNAi	Male	1779.510758	1590.666537	2357.342989	3670.077955	1st_round		346.643	480.639	0.721212
GDF11 M3	M. longipes	Fragment 1, BMP11 RNAi	Male	1732.316089	1554.733203	2244.221394	3280.948371	1st_round		362.998	483.976	0.750033
GDF11 M4	M. longipes	Fragment 1, BMP11 RNAi	Male	1876.935702	1657.57796	2536.129691	3916.443314	1st_round		398.139	527.696	0.754485
GDF11 M5	M. longipes	Fragment 1, BMP11 RNAi	Male	1832.602392	1639.176282	2368.461259	3657.24691	1st_round		373.279	523.376	0.713214
GDF11 M6	M. longipes	Fragment 1, BMP11 RNAi	Male	1967.410081	1794.611805	2935.665253	5648.616483	1st_round	WT-like	477.714	573.122	0.83353
GDF11 M7	M. longipes	Fragment 1, BMP11 RNAi	Male	1981.938198	1795.161208	2945.378676	5390.822082	1st_round	WT-like	448.794	541.926	0.828147
GDF11 M8	M. longipes	Fragment 1, BMP11 RNAi	Male	1812.763702	1587.217665	2394.778086	3762.171833	1st_round		370.288	479.404	0.772392
GDF11 M9	M. longipes	Fragment 1, BMP11 RNAi	Male	1834.537523	1554.927908	2233.198736	3273.010595	1st_round		339.634	478.848	0.709274
GDF11 M10	M. longipes	Fragment 1, BMP11 RNAi	Male	1720.040178	1520.179922	2218.003856	3277.307162	1st_round		327.226	480.395	0.68116
GDF11 M11	M. longipes	Fragment 1, BMP11 RNAi	Male	1856.692288	1636.571739	2402.32626	3752.160403	1st_round		365.503	528.387	0.691734
GDF11 M12	M. longipes	Fragment 1, BMP11 RNAi	Male	1713.778653	1528.833602	2119.296694	3002.348131	1st_round		386.672	508.524	0.760381
GDF11 M13	M. longipes	Fragment 1, BMP11 RNAi	Male	1802.8368	1539.187923	2157.799398	3079.637088	1st_round		347.675	493.388	0.704669
GDF11 M14	M. longipes	Fragment 1, BMP11 RNAi	Male	1844.822943	1617.781104	2403.108313	3793.195178	1st_round		350.295	501.018	0.699168
GDF11 M15	M. longipes	Fragment 1, BMP11 RNAi	Male	1681.472437	1511.743151	2114.949148	2924.158607	1st_round		345.145	479.134	0.720351
GDF11 M16	M. longipes	Fragment 1, BMP11 RNAi	Male	1835.397156	1635.750091	2492.796772	4129.370328	1st_round	WT-like	416.527	505.552	0.823905
GDF11 M17	M. longipes	Fragment 1, BMP11 RNAi	Male	1720.249808	1545.035009	2196.610101	3238.255222	1st_round		374.127	504.192	0.742031
GDF11 M18	M. longipes	Fragment 1, BMP11 RNAi	Male	1944.692897	1656.646811	2735.348268	4952.49184	1st_round	WT-like	419.042	490.889	0.853639
GDF11 M19	M. longipes	Fragment 1, BMP11 RNAi	Male	1618.144481	1418.395471	1947.210984	2675.336726	1st_round		303.354	495.222	0.612561
GDF11 M20	M. longipes	Fragment 1, BMP11 RNAi	Male	2039.709	1812.621	2875.097	4792.067	1st_round		447.792	576.167	0.777191
GDF11 M21	M. longipes	Fragment 1, BMP11 RNAi	Male	1908.73	1712.075	2593.388	4015.343	1st_round		403.242	528.316	0.763259
GDF11 M22	M. longipes	Fragment 1, BMP11 RNAi	Male	1985.761	1798.986	2705.149	4557.377	1st_round		400.257	538.3	0.743557
GDF11 M23	M. longipes	Fragment 1, BMP11 RNAi	Male	1993.392	1771.099	2656.309	4383.497	1st_round		374.827	517.817	0.72386
GDF11 M24	M. longipes	Fragment 1, BMP11 RNAi	Male	1876.244	1650.966	2477.331	3766.921	1st_round		378.596	500.042	0.757128
GDF11 M25	M. longipes	Fragment 1, BMP11 RNAi	Male	1860.775	1666.149	2491.652	3798.465	1st_round		421.018	557.468	0.755233
GDF11 M26	M. longipes	Fragment 1, BMP11 RNAi	Male	1892.827	1624.182	2459.915	3697.606	1st_round		402.434	539.395	0.746084
GDF11 M27	M. longipes	Fragment 1, BMP11 RNAi	Male	1779.564	1607.858	2271.734	3064.25	1st_round		369.647	504.103	0.733277
GDF11 M28	M. longipes	Fragment 1, BMP11 RNAi	Male	1742.599	1501.499	2074.015	2897.114	1st_round		335.675	486.811	0.689539
GDF11 M29	M. longipes	Fragment 1, BMP11 RNAi	Male	1815.433	1585.049	2373.824	3807.025	1st_round		406.978	525.027	0.775156
GDF11 M30	M. longipes	Fragment 1, BMP11 RNAi	Male	1951.046	1762.277	2864.289	4839.101	1st_round	WT-like	387.908	481.224	0.806086
GDF11 M31	M. longipes	Fragment 1, BMP11 RNAi	Male	1864.816	1599.198	2393.187	3332.577	1st_round		415.784	528.236	0.787118
GDF11 M32	M. longipes	Fragment 1, BMP11 RNAi	Male	1787.343	1613.052	2176.975	3130.563	1st_round		386.641	536.66	0.720458
Mlong_GDF11_F3R2_Male1	M. longipes	Fragment 2, BMP11 RNAi	Male	1574	1373.5	1896	2689.5	2nd_round		315	455	0.692308
Mlong_GDF11_F3R2_Male2	M. longipes	Fragment 2, BMP11 RNAi	Male	1570	1354.5	1873	2566.5	2nd_round		322	440	0.731818
Mlong_GDF11_F3R2_Male3	M. longipes	Fragment 2, BMP11 RNAi	Male	1667	1501	2303.5	3426	2nd_round		355	482	0.736515
Mlong_GDF11_F3R2_Male4	M. longipes	Fragment 2, BMP11 RNAi	Male	1703	1609	2585.5	4344.5	2nd_round	WT-like	401	469	0.855011
Mlong_GDF11_F3R2_Male5	M. longipes	Fragment 2, BMP11 RNAi	Male	1784	1450	2229.5	3360.5	2nd_round	WT-like	417	486	0.858025
Mlong_GDF11_F3R2_Male6	M. longipes	Fragment 2, BMP11 RNAi	Male	1617	1419	1859.5	2817.5	2nd_round		348	445	0.782022
Mlong_GDF11_F3R2_Male7	M. longipes	Fragment 2, BMP11 RNAi	Male	1812	1647	2919	5328	2nd_round	WT-like	454	478	0.949791
Mlong_GDF11_F3R2_Male8	M. longipes	Fragment 2, BMP11 RNAi	Male	1854	1753.5	2950	5188	2nd_round	WT-like	424	486	0.872428
Mlong_GDF11_F3R2_Male9	M. longipes	Fragment 2, BMP11 RNAi	Male	1596	1559	2297.5	3430.5	2nd_round		311	431	0.721578
Mlong_GDF11_F3R2_Male10	M. longipes	Fragment 2, BMP11 RNAi	Male	1662	1546.5	2289.5	3640	2nd_round	WT-like	383	443	0.86456
Mlong_GDF11_F3R2_Male11	M. longipes	Fragment 2, BMP11 RNAi	Male	1711	1500.5	2319	3626	2nd_round	WT-like	410	450	0.911111
Mlong_GDF11_F3R2_Male12	M. longipes	Fragment 2, BMP11 RNAi	Male	1729	1565.5	2433	3804.5	2nd_round	WT-like	422	479	0.881002
Mlong_GDF11_F3R2_Male13	M. longipes	Fragment 2, BMP11 RNAi	Male	1793	1631	2638.5	4488	2nd_round	WT-like	422	495	0.852525
Mlong_GDF11_F2R3_Male14	M. longipes	Fragment 3, BMP11 RNAi	Male	1838	1934.758	2770.487	3901.856	2nd_round	WT-like	416	502	0.828685
Mlong_GDF11_F2R3_Male15	M. longipes	Fragment 3, BMP11 RNAi	Male	1722	1575.5745	2448.376	3883.917	2nd_round		354	472	0.75
Mlong_GDF11_F2R3_Male16	M. longipes	Fragment 3, BMP11 RNAi	Male	1707	1583.462	2467.3005	4013.4615	2nd_round	WT-like	379	448	0.845982
Mlong_GDF11_F2R3_Male17	M. longipes	Fragment 3, BMP11 RNAi	Male	1707	1566.16	2335.3415	3689.621	2nd_round	WT-like	389	479	0.812109
Mlong_GDF11_F2R3_Male18	M. longipes	Fragment 3, BMP11 RNAi	Male	1573	1474.5	2165	3080.121	2nd_round		340	467	0.728051
Mlong_GDF11_F2R3_Male19	M. longipes	Fragment 3, BMP11 RNAi	Male	1721	1522.131	2163.8075	3163.3175	2nd_round		355	472	0.752119
Mlong_GDF11_F2R3_Male20	M. longipes	Fragment 3, BMP11 RNAi	Male	1774	1710.5325	2743.824	4640.635	2nd_round	WT-like	408	463	0.88121
Mlong_GDF11_F2R3_Male21	M. longipes	Fragment 3, BMP11 RNAi	Male	1696	1571.1655	2400.1525	3195.3005	2nd_round	WT-like	417	473	0.881607
Mlong_GDF11_F2R3_Male22	M. longipes	Fragment 3, BMP11 RNAi	Male	1617	1519	2280.5905	3424.834	2nd_round	WT-like	380	454	0.837004
Mlong_GDF11_F2R3_Male23	M. longipes	Fragment 3, BMP11 RNAi	Male	1579	1469.1005	2119.8445	3106.6245	2nd_round	WT-like	360	427	0.843091
Mlong_GDF11_F3R2_Female1	M. longipes	Fragment 3, BMP11 RNAi	Female	1651	1155	1669.5	2065	2nd_round		326	462	0.705628
Mlong_GDF11_F3R2_Female2	M. longipes	Fragment 3, BMP11 RNAi	Female	1833	1388	1970.5	2514	2nd_round		371	459	0.808279
Mlong_GDF11_F3R2_Female3	M. longipes	Fragment 3, BMP11 RNAi	Female	1717	1283.5	1830	2264	2nd_round		321	423	0.758865
Mlong_GDF11_F3R2_Female4	M. longipes	Fragment 3, BMP11 RNAi	Female	1753	1243	1735.5	2121	2nd_round		317	464	0.68319
Mlong_GDF11_F3R2_Female5	M. longipes	Fragment 3, BMP11 RNAi	Female	1713	1273.4	1609.951	2100.7515	2nd_round		329	462	0.712121
Mlong_GDF11_F3R2_Female6	M. longipes	Fragment 3, BMP11 RNAi	Female	2206	1803.444	2539.9325	3184.4375	2nd_round		455	553	0.822785
Mlong_GDF11_F3R2_Female7	M. longipes	Fragment 3, BMP11 RNAi	Female	1592	1272.593	2157.7755	2034.793	2nd_round		307	417	0.736211
Mlong_GDF11_F2R3_Female8	M. longipes	Fragment 3, BMP11 RNAi	Female	1858	1345.526	1920.196	2371.0925	2nd_round		344	446	0.7713
Mlong_GDF11_F2R3_Female9	M. longipes	Fragment 3, BMP11 RNAi	Female	1842	1331.718	1877.9205	2282.5645	2nd_round		334	431	0.774942
Mlong_GDF11_F2R3_Female10	M. longipes	Fragment 3, BMP11 RNAi	Female	1985	1425.7775	2046.1815	2637.826	2nd_round		414	457	0.905908
Mlong_GDF11_F2R3_Female11	M. longipes	Fragment 3, BMP11 RNAi	Female	2029	1431.184	2072.0985	2616.596	2nd_round		418	475	0.88
GDF11 F1	M. longipes	Fragment 1, BMP11 RNAi	Female	1910.011832	1331.532967	1894.282752	2365.56032	1st_round		353.518	468.791	0.754105
GDF11 F2	M. longipes	Fragment 1, BMP11 RNAi	Female	1751.44077	1372.600216	1881.831612	2378.718464	1st_round		310.386	435.825	0.71218
GDF11 F3	M. longipes	Fragment 1, BMP11 RNAi	Female	1935.571805	1404.930632	1993.255801	2527.957042	1st_round		420.59	469.427	0.895964
GDF11 F4	M. longipes	Fragment 1, BMP11 RNAi	Female	1969.987558	1444.123947	1985.761024	2606.428694	1st_round		429.49	506.071	0.848676
GDF11 F5	M. longipes	Fragment 1, BMP11 RNAi	Female	1963.93276	1467.597589	2084.823404	2669.336796	1st_round		418.295	511.45	0.81786
GDF11 F6	M. longipes	Fragment 1, BMP11 RNAi	Female	2053.081356	1379.639202	1985.23449	2603.38724	1st_round		422.17	493.913	0.854744
GDF11 F7	M. longipes	Fragment 1, BMP11 RNAi	Female	1731.125283	1374.532064	1819.081374	2316.447029	1st_round		351.117	462.75	0.758761
GDF11 F8	M. longipes	Fragment 1, BMP11 RNAi	Female	2019.62965	1453.494415	1919.939187	2664.224063	1st_round		389.142	501.843	0.775427
GDF11 F9	M. longipes	Fragment 1, BMP11 RNAi	Female	2031.125921	1490.139548	2150.374838	2752.139409	1st_round		440.271	511.547	0.860666
GDF11 F10	M. longipes	Fragment 1, BMP11 RNAi	Female	2018.538574	1333.549788	1966.236878	2447.113585	1st_round		430.866	484.069	0.890091
GDF11 F11	M. longipes	Fragment 1, BMP11 RNAi	Female	1743.04642	1332.695723	1751.931986	2244.976631	1st_round		378.626	437.705	0.865025
GDF11 F12	M. longipes	Fragment 1, BMP11 RNAi	Female	1825.402741	1360.837759	1910.666917	2441.128705	1st_round		396.677	454.491	0.872795
GDF11 F13	M. longipes	Fragment 1, BMP11 RNAi	Female	1659.475827	1197.079447	1788.686815	2048.233538	1st_round		305.726	454.742	0.672307
GDF11 F14	M. longipes	Fragment 1, BMP11 RNAi	Female	1788.197792	1305.720672	1794.18338	2227.033021	1st_round		406.764	437.959	0.928773
GDF11 F15	M. longipes	Fragment 1, BMP11 RNAi	Female	1790.753658	1345.017845	1833.045556	2321.635325	1st_round		460.292	592.618	0.77671
GDF11 F16	M. longipes	Fragment 1, BMP11 RNAi	Female	1819.272108	1333.174183	1874.949197	2299.853062	1st_round		344.394	461.137	0.746837
GDF11 F17	M. longipes	Fragment 1, BMP11 RNAi	Female	1915.111354	1330.904469	1871.38179	2356.19866	1st_round		366.585	442.042	0.8293
GDF11 F18	M. longipes	Fragment 1, BMP11 RNAi	Female	1843.251386	1318.404513	1803.361124	2277.938298	1st_round		358.228	474.79	0.754497
GDF11 F19	M. longipes	Fragment 1, BMP11 RNAi	Female	1810.661831	1352.491919	1843.565226	2305.622572	1st_round		344.277	509.699	0.675452
GDF11 F20	M. longipes	Fragment 1, BMP11 RNAi	Female	1963.580111	1411.516679	2019.147957	2619.111952	1st_round		421.772	512.501	0.822968
GDF11 F21	M. longipes	Fragment 1, BMP11 RNAi	Female	1871.816239	1344.852196	1891.562783	2452.107799	1st_round		359.444	441.971	0.813274
GDF11 F22	M. longipes	Fragment 1, BMP11 RNAi	Female	1995.807525	1412.034112	2064.801848	2672.129913	1st_round		367.451	449.491	0.817483
GDF11 F23	M. longipes	Fragment 1, BMP11 RNAi	Female	1823.989995	1383.397673	1880.942691	2370.97497	1st_round		350.089	490.846	0.713237
GDF11 F24	M. longipes	Fragment 1, BMP11 RNAi	Female	1761.908712	1276.390647	1741.578006	2245.645812	1st_round		377.624	467.909	0.807046
GDF11 F25	M. longipes	Fragment 1, BMP11 RNAi	Female	1761.560093	1334.942309	1894.344602	2407.473811	1st_round		340.785	458.096	0.743917
GDF11 F26	M. longipes	Fragment 1, BMP11 RNAi	Female	1687.813436	1340.801641	1835.605942	2294.920916	1st_round		334.585	460.353	0.726801
GDF11 F27	M. longipes	Fragment 1, BMP11 RNAi	Female	1867.499369	1314.223595	1701.26473	2278.523456	1st_round		433.791	541.13	0.801639
GDF11 F28	M. longipes	Fragment 1, BMP11 RNAi	Female	1805.507609	1359.084152	1961.173425	2461.455753	1st_round		321.503	486.565	0.660762
GDF11 F29	M. longipes	Fragment 1, BMP11 RNAi	Female	1657.419819	1220.264735	1691.211737	2165.858609	1st_round		318.798	450.639	0.707435
GDF11 F30	M. longipes	Fragment 1, BMP11 RNAi	Female	1823.850328	1353.39601	1844.998242	2301.928552	1st_round		400.81	502.1	0.798266
GDF11 F31	M. longipes	Fragment 1, BMP11 RNAi	Female	1795.726147	1430.508554		2333.718495	1st_round		340.888	491.635	0.693375
GDF11 F32	M. longipes	Fragment 1, BMP11 RNAi	Female	1785.610741	1388.802646	1884.026524	2355.868716	1st_round		348.811	470.008	0.742139
GDF11 F33	M. longipes	Fragment 1, BMP11 RNAi	Female	1675.414184	1291.943347	1857.111387	2256.480662	1st_round		353.909	453.138	0.781017
GDF11 F34	M. longipes	Fragment 1, BMP11 RNAi	Female	1911.039639	1417.829964	1979.908877	2510.275689	1st_round		359.475	480.35	0.748362
GDF11 F35	M. longipes	Fragment 1, BMP11 RNAi	Female	1678.40664	1257.247673	1688.814631	2090.857399	1st_round		343.631	472.014	0.728011
GDF11 F36	M. longipes	Fragment 1, BMP11 RNAi	Female	1787.859551	1413.265605	1955.226176	2380.736371	1st_round		357.793	480.464	0.744683
GDF11 F37	M. longipes	Fragment 1, BMP11 RNAi	Female	1869.332686	1414.324041	1950.261295	2476.298531	1st_round		342.71	490.55	0.698623
Ml_Ctl_Sept5Injection_Female1	M. longipes	Buffer injected	Female	2118	1502	2113.5	2732	2nd_round		423	473	0.894292
Ml_Ctl_Sept5Injection_Female2	M. longipes	Buffer injected	Female	2010	1392.275	1994	2402	2nd_round		424	459	0.923747
Ml_Ctl_Sept5Injection_Female3	M. longipes	Buffer injected	Female	1937	1351.892	1891.812	2319.0415	2nd_round		410	472	0.868644
Ml_Ctl_Sept5Injection_Female4	M. longipes	Buffer injected	Female	2021	1410.423	1942.0415	2458.8095	2nd_round		406	449	0.904232
Ml_Ctl_Sept5Injection_Female5	M. longipes	Buffer injected	Female	2022	1392.6265	2017.5425	2536.6705	2nd_round		439	469	0.936034
Ml_Ctl_Sept5Injection_Female6	M. longipes	Buffer injected	Female	2181	1547.6605	2243.386	2862.253	2nd_round		447	507	0.881657
Ml_Ctl_Sept5Injection_Female8	M. longipes	Buffer injected	Female	1920	1398.4255	1906.5455	2393.3285	2nd_round		465	506	0.918972
Ml_Ctl_Sept5Injection_Female9	M. longipes	Buffer injected	Female	2214	1458.414	2107.056	2644.4495	2nd_round		414	444	0.932432
Ml_Ctl_Sept5Injection_Female10	M. longipes	Buffer injected	Female	1997	1393.163	1976.61	2468.132	2nd_round		462	511	0.90411
Ml_Ctl_Sept5Injection_Female11	M. longipes	Buffer injected	Female	1872	1376.077	1886.7645	2364.0185	2nd_round		427	464	0.920259
Ml_Ctl_Sept5Injection_Female12	M. longipes	Buffer injected	Female	1990	1338.3925	1920.659	2379.499	2nd_round		422	459	0.91939
Ml_Ctl_Sept5Injection_Female13	M. longipes	Buffer injected	Female	2093	1484.5	2096	2708.5	2nd_round		399	452	0.882743
Ml_Ctl_Sept5Injection_Female14	M. longipes	Buffer injected	Female	2127	1482.5	2176.5	2804	2nd_round		436	500	0.872
Ml_Ctl_Sept5Injection_Female15	M. longipes	Buffer injected	Female	1990	1405.5	2053	2581	2nd_round		434	490	0.885714
Ml_Ctl_Sept5Injection_Female16	M. longipes	Buffer injected	Female	2003	1355	1946	2482.5	2nd_round		409	491	0.832994
Ml_Ctl_Sept5Injection_Female17	M. longipes	Buffer injected	Female	2239	1505.5	2266	2871	2nd_round		388	456	0.850877
Ml_Ctl_Sept5Injection_Female18	M. longipes	Buffer injected	Female	2081	1441	2043	2598.5	2nd_round		437	502	0.870518
Buffer_Injected_Ctl_Female1	M. longipes	Buffer injected	Female	2068.517788	1480.690691	2250.972752	2934.884888	1st_round		448	506	0.885375
Buffer_Injected_Ctl_Female2	M. longipes	Buffer injected	Female	2049.006882	1464.388176	2128.337034	2737.151266	1st_round		489.859	522.108	0.938233
Buffer_Injected_Ctl_Female3	M. longipes	Buffer injected	Female	1933.750704	1411.678614	1991.969299	2600.064619	1st_round		394.276	473.172	0.83326
Buffer_Injected_Ctl_Female4	M. longipes	Buffer injected	Female	2013.643174	1523.175197	2225.978912	2831.568922	1st_round		428.331	484.085	0.884827
Buffer_Injected_Ctl_Female5	M. longipes	Buffer injected	Female	2112.132947	1503.605945	2194.949917	2881.69279	1st_round		439.584	489.69	0.897679
Buffer_Injected_Ctl_Female6	M. longipes	Buffer injected	Female	2094.899385	1473.848499	2160.331478	2750.082513	1st_round		432.515	512.79	0.843454
Buffer_Injected_Ctl_Female7	M. longipes	Buffer injected	Female	2216.366161	1571.689404	2380.143854	2999.654499	1st_round		487.652	529.629	0.920741
Buffer_Injected_Ctl_Female8	M. longipes	Buffer injected	Female	2009.575199	1434.109051	2102.252384	2711.25979	1st_round		432.693	483.945	0.894094
Buffer_Injected_Ctl_Female9	M. longipes	Buffer injected	Female	2053.037276	1496.615298	2157.141555	2761.248747	1st_round		432	483.216	0.894009
Buffer_Injected_Ctl_Female10	M. longipes	Buffer injected	Female	1990.373786	1308.551189	1889.700151	2523.734453	1st_round		418.422	474.64	0.881556
Buffer_Injected_Ctl_Female11	M. longipes	Buffer injected	Female	2098.171944	1377.839072	2003.826355	2656.250306	1st_round		400.441	466.054	0.859214
Buffer_Injected_Ctl_Female12	M. longipes	Buffer injected	Female	2115.625035	1492.658555	2039.00475	2873.750713	1st_round		412.106	485.582	0.848686
Buffer_Injected_Ctl_Female13	M. longipes	Buffer injected	Female	2086.943969	1511.760177	2222.008432	2890.172567	1st_round		428.538	490.564	0.873563
Buffer_Injected_Ctl_Female14	M. longipes	Buffer injected	Female	2126.442057	1530.55941	2274.915957	2860.569165	1st_round		485.842	506.004	0.960155
Buffer_Injected_Ctl_Female15	M. longipes	Buffer injected	Female	2097.889431	1537.313902	2281.294014	2996.93511	1st_round		447.614	520.518	0.859939
Buffer_Injected_Ctl_Female16	M. longipes	Buffer injected	Female	2139.225565	1455.974071	2159.417884	2791.076512	1st_round		421.896	485.206	0.869518
Buffer_Injected_Ctl_Female17	M. longipes	Buffer injected	Female	2017.460349	1477.078221	2122.446954	2828.254252	1st_round		457.983	510.537	0.897061
Buffer_Injected_Ctl_Female18	M. longipes	Buffer injected	Female	2168.467231	1531.437802	2259.704338	2928.312229	1st_round		418.666	491.387	0.85201
Buffer_Injected_Ctl_Female19	M. longipes	Buffer injected	Female	2078.145579	1472.231554	2114.959194	2703.463542	1st_round		445.282	530.293	0.83969
Buffer_Injected_Ctl_Female20	M. longipes	Buffer injected	Female	1995.199308	1429.702266	2056.290945	2638.664736	1st_round		418.155	451.373	0.926406
Buffer_Injected_Ctl_Female21	M. longipes	Buffer injected	Female	2103.040985	1492.495689	2137.370475	2808.465117	1st_round		427.083	457.67	0.933168
Buffer_Injected_Ctl_Female22	M. longipes	Buffer injected	Female	2057.411554	1518.056018	2201.898563	2832.616253	1st_round		481.675	522.653	0.921596
Buffer_Injected_Ctl_Female23	M. longipes	Buffer injected	Female	2227.382086	1604.127712	2314.09747	3056.412855	1st_round		458.099	526.477	0.870123
Buffer_Injected_Ctl_Female24	M. longipes	Buffer injected	Female	1965.201549	1404.684485	2015.295306	2565.724749	1st_round		442.906	483.921	0.915244
Buffer_Injected_Ctl_Female25	M. longipes	Buffer injected	Female	2112.729111	1458.343612	2126.269103	2736.67268	1st_round		439.285	489.52	0.897379
Buffer_Injected_Ctl_Female26	M. longipes	Buffer injected	Female	2100.385221	1424.409779	2059.658937	2660.182628	1st_round		458.301	490.317	0.934703
Buffer_Injected_Ctl_Female27	M. longipes	Buffer injected	Female	2213.099398	1532.635625	2263.204843	2987.290029	1st_round		443.613	496.443	0.893582
Buffer_Injected_Ctl_Female28	M. longipes	Buffer injected	Female	2238.653306	1560.556401	2272.951132	2939.903782	1st_round		433.083	502.391	0.862045
Buffer_Injected_Ctl_Female29	M. longipes	Buffer injected	Female	2127.223061	1509.579498	2285.458058	2908.911622	1st_round		452.953	513.563	0.88198
Buffer_Injected_Ctl_Female30	M. longipes	Buffer injected	Female	2133.310119	1436.343137	2082.131929	2655.916977	1st_round		401.513	502.882	0.798423
Buffer_Injected_Ctl_Female31	M. longipes	Buffer injected	Female	2162.33278	1501.000637	2100.961562	2735.63039	1st_round		464.441	494.303	0.939588
Buffer_Injected_Ctl_Female32	M. longipes	Buffer injected	Female	2161.904599	1538.070698	2224.848476	2875.118165	1st_round		460.759	534.101	0.862682
Buffer_Injected_Ctl_Female33	M. longipes	Buffer injected	Female	2138.068992	1492.412293	2161.699772	2825.841808	1st_round		486.807	531.064	0.916663
Buffer_Injected_Ctl_Female34	M. longipes	Buffer injected	Female	2216.171294	1600.458269	2428.059633	3151.606671	1st_round		450.343	519.656	0.866617
Buffer_Injected_Ctl_Female35	M. longipes	Buffer injected	Female	2086.646257	1510.497328	2203.100113	2837.385178	1st_round		439.644	506.999	0.86715
Buffer_Injected_Ctl_Female41	M. longipes	Buffer injected	Female	2174.528499	1486.242817	2157.167813	2812.847955	1st_round		426.962	498.814	0.855954
Buffer_Injected_Ctl_Female43	M. longipes	Buffer injected	Female	2054.513898	1429.25027	2084.231296	2658.579225	1st_round		471.657	526.862	0.895219
Buffer_Injected_Ctl_Female44	M. longipes	Buffer injected	Female	2039.335057	1390.748972	1971.598576	2563.794375	1st_round		432.219	488.979	0.883923
Buffer_Injected_Ctl_Female45	M. longipes	Buffer injected	Female	2174.293585	1503.749981	2229.499937	2905.643392	1st_round		441.523	504.568	0.875052
Buffer_Injected_Ctl_Female46	M. longipes	Buffer injected	Female	2067.500143	1457.43709	2136.448563	2757.203484	1st_round		430.831	485.565	0.887278
Buffer_Injected_Ctl_Female48	M. longipes	Buffer injected	Female	2145.337897	1482.60256	2023.587186	2720.327179	1st_round		442.097	508.125	0.870056
Buffer_Injected_Ctl_Female49	M. longipes	Buffer injected	Female	2205.207983	1513.050777	2227.814544	2895.670501	1st_round		435.971	535.838	0.813625
Buffer_Injected_Ctl_Female50	M. longipes	Buffer injected	Female	2113.737458	1531.638937	2202.869528	2870.113044	1st_round		393.873	505.59	0.779036
Buffer_Injected_Ctl_Female51	M. longipes	Buffer injected	Female	2202.200357	1500.452327	2131.169331	2773.217063	1st_round		392.527	490.263	0.800646
WT_Ctl_Male1	M. longipes	Buffer injected	Male	1836	1751	2932.5	5235.5	2nd_round		406	488	0.831967
WT_Ctl_Male2	M. longipes	Buffer injected	Male	2062	1913.5	3658.5	7080	2nd_round		458	524	0.874046
WT_Ctl_Male3	M. longipes	Buffer injected	Male	1716	1604.5	2499	4095.5	2nd_round		366	443	0.826185
WT_Ctl_Male4	M. longipes	Buffer injected	Male	1827	1704	2700	4634	2nd_round		408	493	0.827586
WT_Ctl_Male5	M. longipes	Buffer injected	Male	1759	1620	2416.5	3826	2nd_round		385	451	0.853659
WT_Ctl_Male6	M. longipes	Buffer injected	Male	1957	1824.5	3159	5734.5	2nd_round		438	499	0.877756
WT_Ctl_Male7	M. longipes	Buffer injected	Male	1988	1958	3571.5	6692.5	2nd_round		451	506	0.891304
WT_Ctl_Male8	M. longipes	Buffer injected	Male	1995	1786	3031	5304	2nd_round		436	487	0.895277
WT_Ctl_Male9	M. longipes	Buffer injected	Male	2042	1936.5	3466	6664.5	2nd_round		460	553	0.831826
WT_Ctl_Male10	M. longipes	Buffer injected	Male	1875	1742	2864.5	4926.5	2nd_round		401	480	0.835417
WT_Ctl_Male11	M. longipes	Buffer injected	Male	1747	1614.5	2527.5	4258.5	2nd_round		393	464	0.846983
WT_Ctl_Male12	M. longipes	Buffer injected	Male	1842	1735.5	2876.5	5021	2nd_round		441	448	0.984375
WT_Ctl_Male13	M. longipes	Buffer injected	Male	1846	1645	2737.5	4643	2nd_round		433	484	0.894628
WT_Ctl_Male14	M. longipes	Buffer injected	Male	1833	1641	2675	4608	2nd_round		377	463	0.814255
WT_Ctl_Male15	M. longipes	Buffer injected	Male	1767	1664.5	2476	3802.5	2nd_round		426	473	0.900634
WT_Ctl_Male16	M. longipes	Buffer injected	Male	1758	1688.5	2718.5		2nd_round		446	480	0.929167
WT_Ctl_Male17	M. longipes	Buffer injected	Male	1850	1750.5	2879	4885.5	2nd_round		417	475	0.877895
WT_Ctl_Male18	M. longipes	Buffer injected	Male	1813	1749	2844	4966.5	2nd_round		425	463	0.917927
WT_Ctl_Male19	M. longipes	Buffer injected	Male	1796	1672	2612.5	4162	2nd_round		381	452	0.84292
WT_Ctl_Male20	M. longipes	Buffer injected	Male	1789	1671.5	2409.5	3905	2nd_round		382	464	0.823276
Buffer_Injected_Ctl_Male1	M. longipes	Buffer injected	Male	2038.105615	1834.270476	3351.31422	6277.537069	1st_round		482.655	549.824	0.877836
Buffer_Injected_Ctl_Male2	M. longipes	Buffer injected	Male	1897.074273	1740.126666	2826.278354	4824.941978	1st_round		387.721	489.306	0.79239
Buffer_Injected_Ctl_Male3	M. longipes	Buffer injected	Male	1969.587257	1806.581815	2994.896587	5291.225043	1st_round		388.635	519.015	0.748794
Buffer_Injected_Ctl_Male4	M. longipes	Buffer injected	Male	2048.743751	1862.786023	3461.166995	6554.820035	1st_round		480.996	543.209	0.88547
Buffer_Injected_Ctl_Male5	M. longipes	Buffer injected	Male	2024.527347	1893.372661	3390.653133	6598.344718	1st_round		454.346	514.351	0.883338
Buffer_Injected_Ctl_Male6	M. longipes	Buffer injected	Male	1897.706863	1778.707082	2832.872938	5154.470131	1st_round		420.917	493.871	0.852282
Buffer_Injected_Ctl_Male7	M. longipes	Buffer injected	Male	1984.226215	1884.95427	3422.843026	6415.71648	1st_round		449.247	506.849	0.886353
Buffer_Injected_Ctl_Male8	M. longipes	Buffer injected	Male	2060.199722	1851.511607	3323.289934	6165.23617	1st_round		453.702	532.892	0.851396
Buffer_Injected_Ctl_Male9	M. longipes	Buffer injected	Male	2053.373805	1915.478591	3466.068225	6624.281353	1st_round		437.354	519.267	0.842253
Buffer_Injected_Ctl_Male10	M. longipes	Buffer injected	Male	1896.134839	1705.80167	2527.491272	4110.074599	1st_round		425.629	502.075	0.84774
Buffer_Injected_Ctl_Male11	M. longipes	Buffer injected	Male	2176.58618	2052.26597	4065.986872	8400.658762	1st_round		459.574	549.121	0.836927
Buffer_Injected_Ctl_Male12	M. longipes	Buffer injected	Male	2134.124853	2026.688441	3811.012793	7284.76788	1st_round		459.766	553.649	0.830429
Buffer_Injected_Ctl_Male13	M. longipes	Buffer injected	Male	2021.634081	1876.462181	3439.779108	6770.703165	1st_round		485.665	540.797	0.898054
Buffer_Injected_Ctl_Male14	M. longipes	Buffer injected	Male	1830.719869	1677.633483	2600.766158	4553.925001	1st_round		420.361	487.396	0.862463
Buffer_Injected_Ctl_Male15	M. longipes	Buffer injected	Male	2134.933724	1899.3883	3371.531966	6514.573141	1st_round		510.469	590.334	0.864713
Buffer_Injected_Ctl_Male16	M. longipes	Buffer injected	Male	2101.254129	1930.403329	3614.13973	7162.349096	1st_round		512.353	555.844	0.921756
Buffer_Injected_Ctl_Male17	M. longipes	Buffer injected	Male	2081.826351	1892.991246	3517.369557	6887.353812	1st_round		466.08	542.479	0.859168
Buffer_Injected_Ctl_Male18	M. longipes	Buffer injected	Male	2112.623482	1945.69623	3491.519153	7111.822955	1st_round		520.846	563.444	0.924397
Buffer_Injected_Ctl_Male19	M. longipes	Buffer injected	Male	2098.024303	1936.740079	3168.558244	6368.189171	1st_round		481.032	520.934	0.923402
Buffer_Injected_Ctl_Male20	M. longipes	Buffer injected	Male	1970.856467	1864.29403	3237.140855	6013.832723	1st_round		454.325	534.657	0.849749
Buffer_Injected_Ctl_Male21	M. longipes	Buffer injected	Male	1997.463528	1818.970905	3086.43124	5895.151976	1st_round		426.327	500.119	0.852451
Buffer_Injected_Ctl_Male22	M. longipes	Buffer injected	Male	2044.527798	1881.416514	3206.774701	6232.171063	1st_round		464.075	529.76	0.876011
Buffer_Injected_Ctl_Male23	M. longipes	Buffer injected	Male	2000.143307	1822.823953	3091.651043	5962.276526	1st_round		462.327	514.113	0.899272
Buffer_Injected_Ctl_Male24	M. longipes	Buffer injected	Male	1982.194349	1789.903572	3075.219928	5655.174623	1st_round		433.197	523.905	0.826862
Buffer_Injected_Ctl_Male25	M. longipes	Buffer injected	Male	1955.564311	1709.719901	2798.139519	4822.97449	1st_round		449.677	502.071	0.895645
Buffer_Injected_Ctl_Male26	M. longipes	Buffer injected	Male	1900.665976	1762.16901	2785.526649	4587.261516	1st_round		426.593	487.378	0.875281
Buffer_Injected_Ctl_Male27	M. longipes	Buffer injected	Male	1858.058367	1639.882546	2551.415367	4340.253701	1st_round		415.179	496.833	0.835651
Buffer_Injected_Ctl_Male28	M. longipes	Buffer injected	Male	1956.943458	1803.843925	3125.282252	5962.086993	1st_round		412.618	501.308	0.823083
Buffer_Injected_Ctl_Male29	M. longipes	Buffer injected	Male	1957.101114	1802.228905	2873.920751	4987.982524	1st_round		482.86	519.483	0.929502
Buffer_Injected_Ctl_Male30	M. longipes	Buffer injected	Male	1915.144237	1706.080169	2698.301942	4622.963606	1st_round		485.745	529.556	0.917267
Buffer_Injected_Ctl_Male31	M. longipes	Buffer injected	Male	1917.876632	1731.309615	2790.951934	4875.080839	1st_round		421.498	496.527	0.848892
Buffer_Injected_Ctl_Male32	M. longipes	Buffer injected	Male	1901.704956	1703.82129	2504.957957	3978.977576	1st_round		460.669	513.187	0.897664
Buffer_Injected_Ctl_Male33	M. longipes	Buffer injected	Male	1804.802285	1697.017638	2473.773428	4325.545823	1st_round		409.282	478.777	0.854848
M_pulchella_GDF_Dec20_Male1	M. pulchella	BMP11 RNAi	Male	1227	1023	1268	1480.5	2nd_round		Not applicable	Not applicable
M_pulchella_GDF_Dec20_Male2	M. pulchella	BMP11 RNAi	Male	1183	941	1141.5	1381.5	2nd_round		Not applicable	Not applicable
M_pulchella_GDF_Dec20_Male3	M. pulchella	BMP11 RNAi	Male	1048	905.5	1134.5	1322.5	2nd_round		Not applicable	Not applicable
M_pulchella_GDF_Dec20_Male4	M. pulchella	BMP11 RNAi	Male	1214	975.5	1240	1390.5	2nd_round		Not applicable	Not applicable
M_pulchella_GDF_Dec20_Male5	M. pulchella	BMP11 RNAi	Male	1252	1006	1262.5	1456.5	2nd_round		Not applicable	Not applicable
M_pulchella_GDF_Dec20_Male6	M. pulchella	BMP11 RNAi	Male	1488	1071	1406.5	1702	2nd_round		Not applicable	Not applicable
M_pulchella_GDF_Dec20_Male7	M. pulchella	BMP11 RNAi	Male	1211	947.5	1241.5	1435	2nd_round		Not applicable	Not applicable
M_pulchella_GDF_Dec20_Male8	M. pulchella	BMP11 RNAi	Male	1211	985	1270.5	1431	2nd_round		Not applicable	Not applicable
M_pulchella_GDF_Dec20_Male9	M. pulchella	BMP11 RNAi	Male	1304	971	1260.5	1461	2nd_round		Not applicable	Not applicable
M_pulchella_GDF_Dec20_Male10	M. pulchella	BMP11 RNAi	Male	1405	983.5	1277	1520	2nd_round		Not applicable	Not applicable
M_pulchella_GDF_Dec20_Male11	M. pulchella	BMP11 RNAi	Male	1377	1042	1366.5	1560.5	2nd_round		Not applicable	Not applicable
M_pulchella_GDF_Dec20_Male12 W	M. pulchella	BMP11 RNAi	Male	1221	951.5	1209	1404	2nd_round	winged, excluded	Not applicable	Not applicable
M_pulchella_GDF_Dec20_Male13	M. pulchella	BMP11 RNAi	Male	1211	951.5	1196	1411	2nd_round		Not applicable	Not applicable
M_pulchella_GDF_Dec20_Male14	M. pulchella	BMP11 RNAi	Male	1213	933	1235	1417	2nd_round		Not applicable	Not applicable
M_pulchella_GDF_Dec20_Male15	M. pulchella	BMP11 RNAi	Male	1214	927.5	1168	1315.5	2nd_round		Not applicable	Not applicable
M_pulchella_GDF_Dec20_Male16	M. pulchella	BMP11 RNAi	Male	1343	982.5	1305.5	1546	2nd_round		Not applicable	Not applicable
M_pulchella_GDF_Dec20_Female1	M. pulchella	BMP11 RNAi	Female	1484	1001.5	1303	1492	2nd_round		Not applicable	Not applicable
M_pulchella_GDF_Dec20_Female2	M. pulchella	BMP11 RNAi	Female	1363	908.5	1222	1372.5	2nd_round		Not applicable	Not applicable
M_pulchella_GDF_Dec20_Female3	M. pulchella	BMP11 RNAi	Female	1427	987.5	1293	1463.5	2nd_round		Not applicable	Not applicable
M_pulchella_GDF_Dec20_Female4	M. pulchella	BMP11 RNAi	Female	1396	944.5	1219	1362	2nd_round		Not applicable	Not applicable
M_pulchella_GDF_Dec20_Female5	M. pulchella	BMP11 RNAi	Female	1425	985	1249.5	1429.5	2nd_round		Not applicable	Not applicable
M_pulchella_GDF_Dec20_Female6	M. pulchella	BMP11 RNAi	Female	1398	993	1428.5	1268.5	2nd_round		Not applicable	Not applicable
M_pulchella_GDF_Dec20_Female7	M. pulchella	BMP11 RNAi	Female	1513	987	1295.5	1470	2nd_round		Not applicable	Not applicable
M_pulchella_GDF_Dec20_Female8	M. pulchella	BMP11 RNAi	Female	1572	1051	1302.5	1537	2nd_round		Not applicable	Not applicable
M_pulchella_GDF_Dec20_Female10	M. pulchella	BMP11 RNAi	Female	1288	913	1145.5	1343.5	2nd_round		Not applicable	Not applicable
M_pulchella_GDF_Dec20_Female12	M. pulchella	BMP11 RNAi	Female	1293	888	1148.5	1302	2nd_round		Not applicable	Not applicable
M_pulchella_ctl_Dec20_Male1	M. pulchella	Buffer injected	Male	1731	1203.5	1605	1932	2nd_round		Not applicable	Not applicable
M_pulchella_ctl_Dec20_Male2	M. pulchella	Buffer injected	Male	1568	1084.5	1496.5	1815	2nd_round		Not applicable	Not applicable
M_pulchella_ctl_Dec20_Male3	M. pulchella	Buffer injected	Male	1095	888	1163.5	1350	2nd_round		Not applicable	Not applicable
M_pulchella_ctl_Dec20_Male4	M. pulchella	Buffer injected	Male	1488	1085	1428	1763	2nd_round		Not applicable	Not applicable
M_pulchella_ctl_Dec20_Male5	M. pulchella	Buffer injected	Male	1832	1003	1354.5	1617.5	2nd_round		Not applicable	Not applicable
M_pulchella_ctl_Dec20_Male6	M. pulchella	Buffer injected	Male	1223	985	1283.5	1483	2nd_round		Not applicable	Not applicable
M_pulchella_ctl_Dec20_Male7	M. pulchella	Buffer injected	Male	1612	1165	1541	1849	2nd_round		Not applicable	Not applicable
M_pulchella_ctl_Dec20_Male8 W	M. pulchella	Buffer injected	Male	1848	1140	1548	1859.5	2nd_round	winged, excluded	Not applicable	Not applicable
M_pulchella_ctl_Dec20_Male9	M. pulchella	Buffer injected	Male	1731	1173	1587	1958	2nd_round		Not applicable	Not applicable
M_pulchella_ctl_Dec20_Male10	M. pulchella	Buffer injected	Male	1426	1060.5	1396	1656	2nd_round		Not applicable	Not applicable
M_pulchella_ctl_Dec20_Male11	M. pulchella	Buffer injected	Male	1457	1093	1449.5	1738.5	2nd_round		Not applicable	Not applicable
M_pulchella_ctl_Dec20_Male12	M. pulchella	Buffer injected	Male	1406	1039.5	1421	1677.5	2nd_round		Not applicable	Not applicable
M_pulchella_ctl_Dec20_Male13	M. pulchella	Buffer injected	Male	1386	1024	1382.5	1606.5	2nd_round		Not applicable	Not applicable
M_pulchella_ctl_Dec20_Male14	M. pulchella	Buffer injected	Male	1465	1024.5	1331	1589	2nd_round		Not applicable	Not applicable
M_pulchella_ctl_Dec20_Male15	M. pulchella	Buffer injected	Male	1295	994	1265	1473.5	2nd_round		Not applicable	Not applicable
M_pulchella_ctl_Dec20_Male16	M. pulchella	Buffer injected	Male	1381	1048	1409	1641.5	2nd_round		Not applicable	Not applicable
M_pulchella_ctl_Dec20_Male17	M. pulchella	Buffer injected	Male	1262	986	1279.5	1483.5	2nd_round		Not applicable	Not applicable
M_pulchella_ctl_Dec20_Male18	M. pulchella	Buffer injected	Male	1419	1016	1326	1604	2nd_round		Not applicable	Not applicable
M_pulchella_ctl_Dec20_Male19	M. pulchella	Buffer injected	Male	1308	1023.5	1369	1604	2nd_round		Not applicable	Not applicable
M_pulchella_ctl_Dec20_Female1	M. pulchella	Buffer injected	Female	1633	1057.5	1403.5	1609	2nd_round		Not applicable	Not applicable
M_pulchella_ctl_Dec20_Female2	M. pulchella	Buffer injected	Female	1485	954	1306.5	1418	2nd_round		Not applicable	Not applicable
M_pulchella_ctl_Dec20_Female3	M. pulchella	Buffer injected	Female	1622	1045.5	1402	1627	2nd_round		Not applicable	Not applicable
M_pulchella_ctl_Dec20_Female4	M. pulchella	Buffer injected	Female	1583	1035	1314.5	1550	2nd_round		Not applicable	Not applicable
M_pulchella_ctl_Dec20_Female5	M. pulchella	Buffer injected	Female	1618	1081.5	1411	1575.5	2nd_round		Not applicable	Not applicable
M_pulchella_ctl_Dec20_Female6	M. pulchella	Buffer injected	Female	1521	972.5	1262	1450	2nd_round		Not applicable	Not applicable
M_pulchella_ctl_Dec20_Female7	M. pulchella	Buffer injected	Female	1520	990.5	3293.5	1463	2nd_round		Not applicable	Not applicable
M_pulchella_ctl_Dec20_Female8	M. pulchella	Buffer injected	Female	1589	1038	1340.5	1531.5	2nd_round		Not applicable	Not applicable
M_pulchella_ctl_Dec20_Female9	M. pulchella	Buffer injected	Female	1483	1037.5	1336	1530	2nd_round		Not applicable	Not applicable
M_pulchella_ctl_Dec20_Female10	M. pulchella	Buffer injected	Female	1645	1026	1352	1554.5	2nd_round		Not applicable	Not applicable
M_pulchella_ctl_Dec20_Female11	M. pulchella	Buffer injected	Female	1685	1111	1449	1665	2nd_round		Not applicable	Not applicable
M_pulchella_ctl_Dec20_Female12	M. pulchella	Buffer injected	Female	1609	1019	1317	1507.5	2nd_round		Not applicable	Not applicable
M_pulchella_ctl_Dec20_Female13 W	M. pulchella	Buffer injected	Female	1834	1028	1390	1662.5	2nd_round	winged, excluded	Not applicable	Not applicable
M_pulchella_ctl_Dec20_Female14	M. pulchella	Buffer injected	Female	1540	1050.5	1384	1593	2nd_round		Not applicable	Not applicable
M_pulchella_ctl_Dec20_Female15 W	M. pulchella	Buffer injected	Female	1941	1099	1526	1785.5	2nd_round	winged, excluded	Not applicable	Not applicable
M_pulchella_ctl_Dec20_Female16 W	M. pulchella	Buffer injected	Female	1977	1077	1461.5	1758	2nd_round	winged, excluded	Not applicable	Not applicable
M_pulchella_ctl_Dec20_Female17	M. pulchella	Buffer injected	Female	1502	979.5	1276.5	1461.5	2nd_round		Not applicable	Not applicable
M_pulchella_ctl_Dec20_Female18 W	M. pulchella	Buffer injected	Female	1937	1118	1451.5	1715.5	2nd_round	winged, excluded	Not applicable	Not applicable
M_pulchella_ctl_Dec20_Female19	M. pulchella	Buffer injected	Female	1704	1076.5	1416	1602	2nd_round		Not applicable	Not applicable
M_pulchella_ctl_Dec20_Female20	M. pulchella	Buffer injected	Female	1605	1049.5	1347.5	1536	2nd_round		Not applicable	Not applicable
M_pulchella_ctl_Dec20_Female21	M. pulchella	Buffer injected	Female	1496	991.5	1315.5	1504	2nd_round		Not applicable	Not applicable
M_pulchella_ctl_Dec20_Female22	M. pulchella	Buffer injected	Female	1430	972	1261	1391.5	2nd_round		Not applicable	Not applicable
1	M. longipes	Ubx RNAi	Male	2148.544093	1965.890978	3574.428224	5552.812396	1st_round	none
2	M. longipes	Ubx RNAi	Male	1923.15298	1680.849895	2621.134283	3928.243166	1st_round	none
3	M. longipes	Ubx RNAi	Male	2062.377007	1907.803339	3337.513442	5840.409566	1st_round	none
4	M. longipes	Ubx RNAi	Male	1916.925139	1483.923629	2343.931088	3356.31716	1st_round	none
5	M. longipes	Ubx RNAi	Male	2023.711075	1880.950179	3415.113702	5452.559595	1st_round	none
6	M. longipes	Ubx RNAi	Male	1962.897492	1767.169595	3033.359403	5366.386035	1st_round	none
7	M. longipes	Ubx RNAi	Male	2033.863683	1862.842545	3062.285748	4736.021569	1st_round	none
8	M. longipes	Ubx RNAi	Male	1923.37798	1678.81636	2463.163608	3740.601681	1st_round	none
9	M. longipes	Ubx RNAi	Male	1879.606278	1725.086844	2540.111688	4131.70523	1st_round	none
10	M. longipes	Ubx RNAi	Male	1921.387997	1694.172642	2711.403498	4613.450843	1st_round	none
11	M. longipes	Ubx RNAi	Male	1980.667578	1765.98285	2815.223342	3908.01368	1st_round	none
12	M. longipes	Ubx RNAi	Male	1826.04372	1677.184663	2491.244903	3675.422477	1st_round	none
13	M. longipes	Ubx RNAi	Male	2100.427714	1938.20443	3383.159159	5182.298264	1st_round	none
14	M. longipes	Ubx RNAi	Male	1954.01985	1848.907894	3053.279224	4742.362606	1st_round	none
15	M. longipes	Ubx RNAi	Male	2167.539502	1970.097833	3532.687488	6185.128492	1st_round	none
16	M. longipes	Ubx RNAi	Male	2101.659531	1991.147323	3689.50886	6588.945302	1st_round	none
17	M. longipes	Ubx RNAi	Male	2036.83247	1859.143251	3135.07558	4833.302907	1st_round	none
18	M. longipes	Ubx RNAi	Male	2109.11537	1928.558191	3347.71097	5946.51727	1st_round	none
19	M. longipes	Ubx RNAi	Male	1972.656478	1948.765966	3341.89421	5016.371673	1st_round	none
20	M. longipes	Ubx RNAi	Male	1945.080759	1757.14675	2837.72213	4263.914007	1st_round	none
21	M. longipes	Ubx RNAi	Male	1976.575433	1844.380829	3155.722072	4249.043117	1st_round	none
22	M. longipes	Ubx RNAi	Male	1972.056229	1788.064382	2732.340896	3854.101074	1st_round	none
23	M. longipes	Ubx RNAi	Male	1953.476186	1729.83905	2507.594149	3779.655515	1st_round	none
24	M. longipes	Ubx RNAi	Male	2135.043277	1992.99434	3760.547409	7065.864773	1st_round	none
25	M. longipes	Ubx RNAi	Male	1993.082778	1878.410659	2950.418751	4142.84019	1st_round	none
26	M. longipes	Ubx RNAi	Male	2221.767939	1952.447412	3576.352532	6172.170717	1st_round	none
27	M. longipes	Ubx RNAi	Male	1944.636446	1801.262918	2939.799127	4955.076818	1st_round	none
28	M. longipes	Ubx RNAi	Male	2111.874411	1952.174759	3530.37782	6461.954585	1st_round	none
29	M. longipes	Ubx RNAi	Male	2069.630707	1955.437441	3345.54944	5120.271628	1st_round	none
30	M. longipes	Ubx RNAi	Male	1874.910649	1761.815894	2637.624954	3636.529032	1st_round	none
31	M. longipes	Ubx RNAi	Male	1983.233532	1775.425695	2784.237755	3962.161514	1st_round	none
32	M. longipes	Ubx RNAi	Male	2112.521673	1987.163738	3610.721963	5930.64703	1st_round	none
1	M. longipes	Ubx RNAi	Female	2155.42688	1493.561335	2179.417375	2734.523624	1st_round	none
2	M. longipes	Ubx RNAi	Female	2002.891722	1407.697811	1991.361834	2439.782218	1st_round	none
3	M. longipes	Ubx RNAi	Female	2088.785895	1390.473835	1997.72698	2492.414238	1st_round	none
4	M. longipes	Ubx RNAi	Female	2045.855782	1460.540566	2115.188674	2717.369038	1st_round	none
5	M. longipes	Ubx RNAi	Female	2075.428753	1404.262129	1994.026584	2481.408486	1st_round	none
6	M. longipes	Ubx RNAi	Female	2071.257736	1468.615486	2092.429058	2671.830561	1st_round	none
7	M. longipes	Ubx RNAi	Female	2024.590444	1414.860014	2042.641465	2411.163446	1st_round	none
8	M. longipes	Ubx RNAi	Female	1964.36865	1430.477642	2002.267308	2522.515752	1st_round	none
9	M. longipes	Ubx RNAi	Female	1953.198522	1420.9134	1948.184601	2487.406614	1st_round	none
10	M. longipes	Ubx RNAi	Female	1993.142743	1441.019249	2052.523642	2551.159038	1st_round	none
11	M. longipes	Ubx RNAi	Female	2058.109372	1431.109535	2033.194519	2569.782341	1st_round	none
12	M. longipes	Ubx RNAi	Female	1968.796681	1411.800914	2000.804907	2261.231129	1st_round	none
13	M. longipes	Ubx RNAi	Female	2110.355326	1463.740915	2137.38852	2583.877327	1st_round	none
14	M. longipes	Ubx RNAi	Female	2027.644271	1433.07311	2063.599744	2585.967249	1st_round	none
15	M. longipes	Ubx RNAi	Female	2016.380472	1403.250696	1996.875574	2485.392948	1st_round	none
16	M. longipes	Ubx RNAi	Female	2091.901339	1456.423103	2073.706246	2530.498881	1st_round	none
17	M. longipes	Ubx RNAi	Female	1906.068282	1347.794458	1960.575009	2391.41772	1st_round	none
18	M. longipes	Ubx RNAi	Female	1978.134434	1438.842817	2139.083428	2691.987308	1st_round	none
